# Supplementary material for: An Unusual Rearrangement of Pyrazole Nitrene and Coarctate Ring-Opening/Recyclization Cascade: Formal CH–Acetoxylation and Azide/Amine Conversion without External Oxidants and Reductants
Source: MDPI journal article supplement (doi:10.3390/molecules28217335), 2023-10-30
Supplement: s1 [file s1]

# An Unusual Rearrangement of Pyrazole Nitrene and Coarctate Ring-Opening/Recyclization Cascade: Formal CH–Acetoxylation and Azide/Amine Conversion without External Oxidants and Reductants

Elena Chugunova <sup>1,\*</sup>, Almir S. Gazizov <sup>1</sup>, Daut Islamov <sup>1</sup>, Victoria Matveeva <sup>1</sup>, Alexander Burilov <sup>1</sup>, Nurgali Akylbekov <sup>2</sup>, Alexey Dobrynin <sup>1</sup>, Rakhmetulla Zhapparbergenov <sup>2</sup>, Nurbol Appazov <sup>2,3,\*</sup>, Beauty K. Chabuka <sup>4</sup>, Kimberley Christopher <sup>4</sup>, Daria I. Tonkoglazova <sup>4</sup> and Igor V. Alabugin <sup>1,4</sup>

<sup>1</sup> Arbuzov Institute of Organic and Physical Chemistry, FRC Kazan Scientific Center, Russian Academy of Sciences, Akad. Arbuzov St. 8, Kazan 420088, Russia; agazizov@iopc.ru (A.S.G.); daut1989@mail.ru (D.I.); vict.matveeva@hotmail.com (V.M.); burilov\_2004@mail.ru (A.B.); aldo@iopc.ru (A.D.); ialabugin@gmail.com (I.V.A.)

<sup>2</sup> Laboratory of Engineering Profile “Physical and Chemical Methods of Analysis”, Korkyt Ata Kyzylorda University, Aitekebie Str. 29A, Kyzylorda 120014, Kazakhstan; nurgali\_089@mail.ru (N.A.); ulagat-91@mail.ru (R.Z.)

<sup>3</sup> Zhakhaev Kazakh Scientific Research Institute of Rice Growing, Abay Av. 25B, Kyzylorda 120008, Kazakhstan

<sup>4</sup> Department of Chemistry and Biochemistry, Florida State University, 95 Chieftan Way, Tallahassee, FL 32306-3290, USA; bc21i@fsu.edu (B.K.C.); kmc23@fsu.edu (K.C.); dt22k@fsu.edu (D.I.T.)

\* Correspondence: chugunova.e.a@gmail.com (E.C.); nurasar.82@mail.ru (N.A.); Tel.: +7-843-272-7324 (E.C.); +8(7242)-23-10-41 (N.A.)

**Experimental details, copies of NMR spectra, X-ray crystallographic data, computational details**

## Table of contents

|                                                                               |    |
|-------------------------------------------------------------------------------|----|
| Copies of <sup>1</sup> H and <sup>13</sup> C NMR spectra (Figs. S1-S12) ..... | 2  |
| X-ray data (Figs. S13-S14) .....                                              | 8  |
| Computational details .....                                                   | 9  |
| References .....                                                              | 25 |

# NMR spectra of compounds

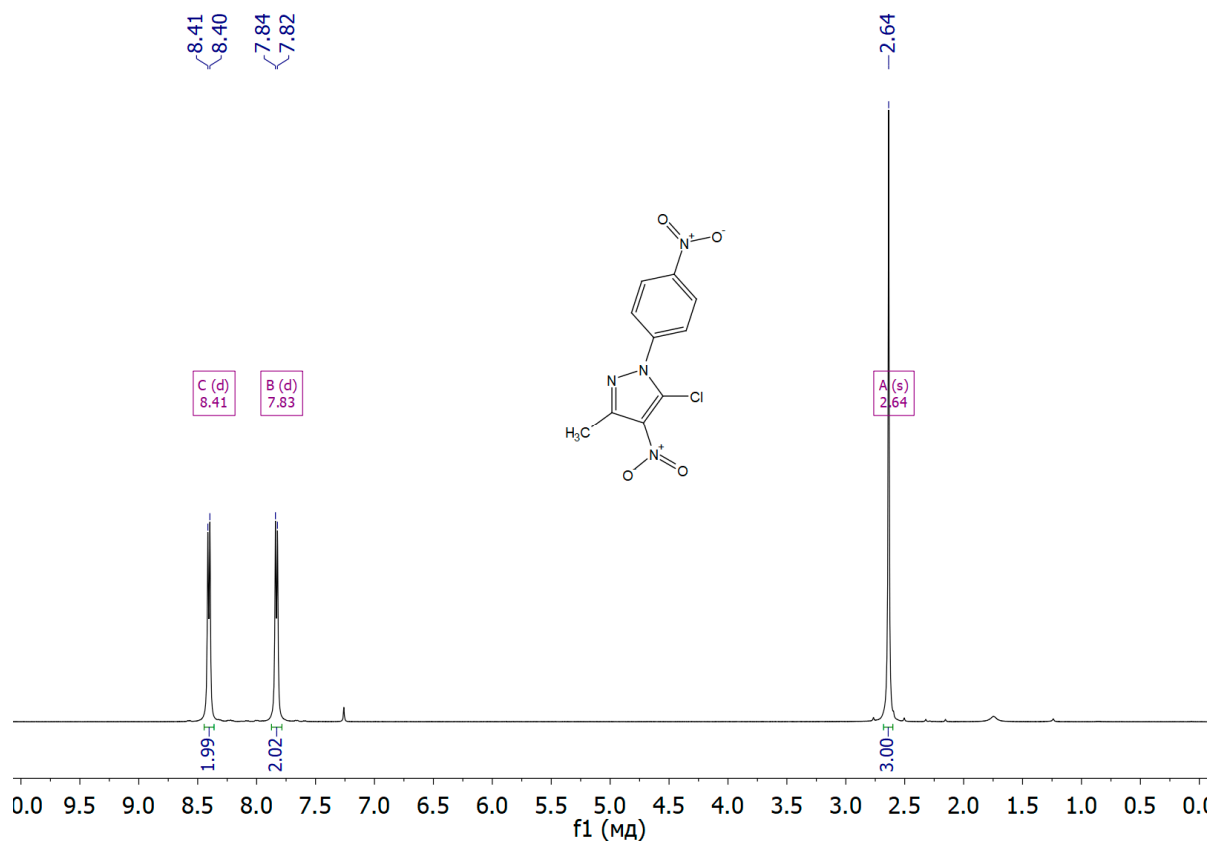

Figure S1. <sup>1</sup>H NMR spectrum of **3** (CDCl<sub>3</sub>, 500 MHz)

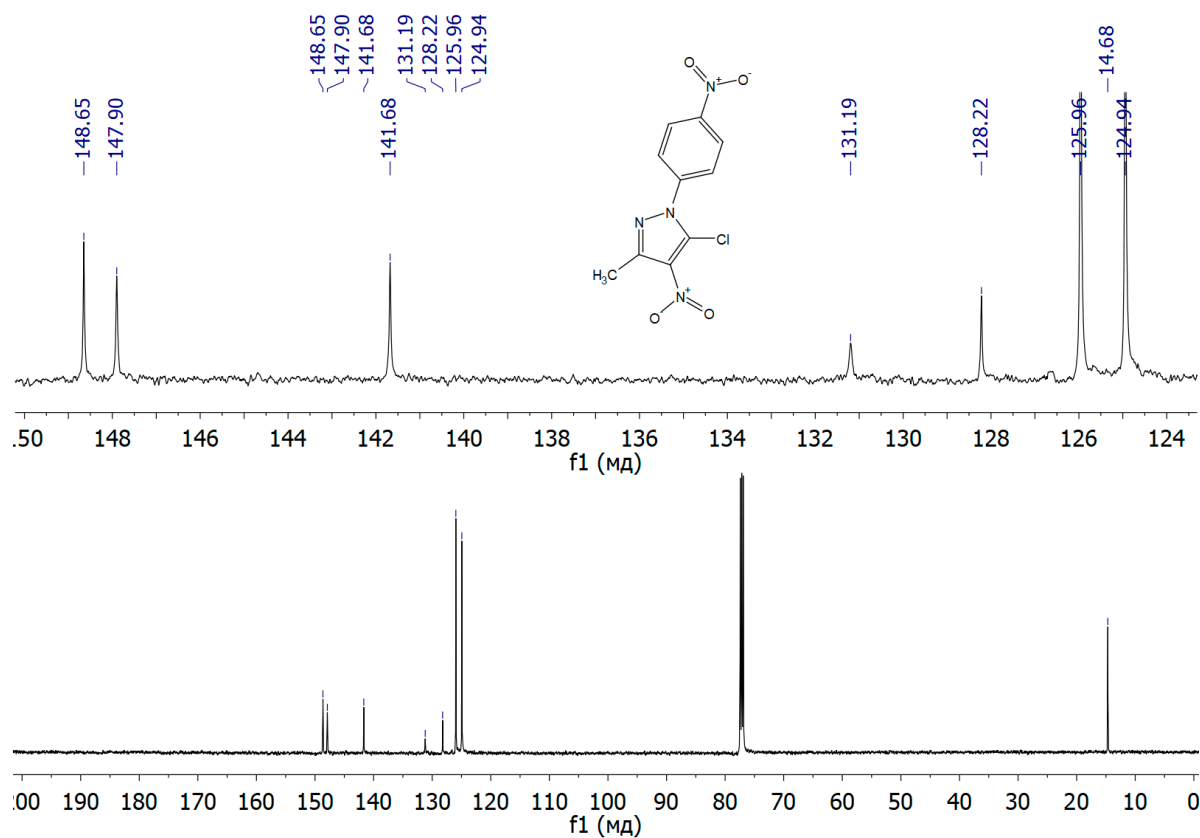

Figure S2. <sup>13</sup>C NMR spectrum of **3** (CDCl<sub>3</sub>, 126 MHz)

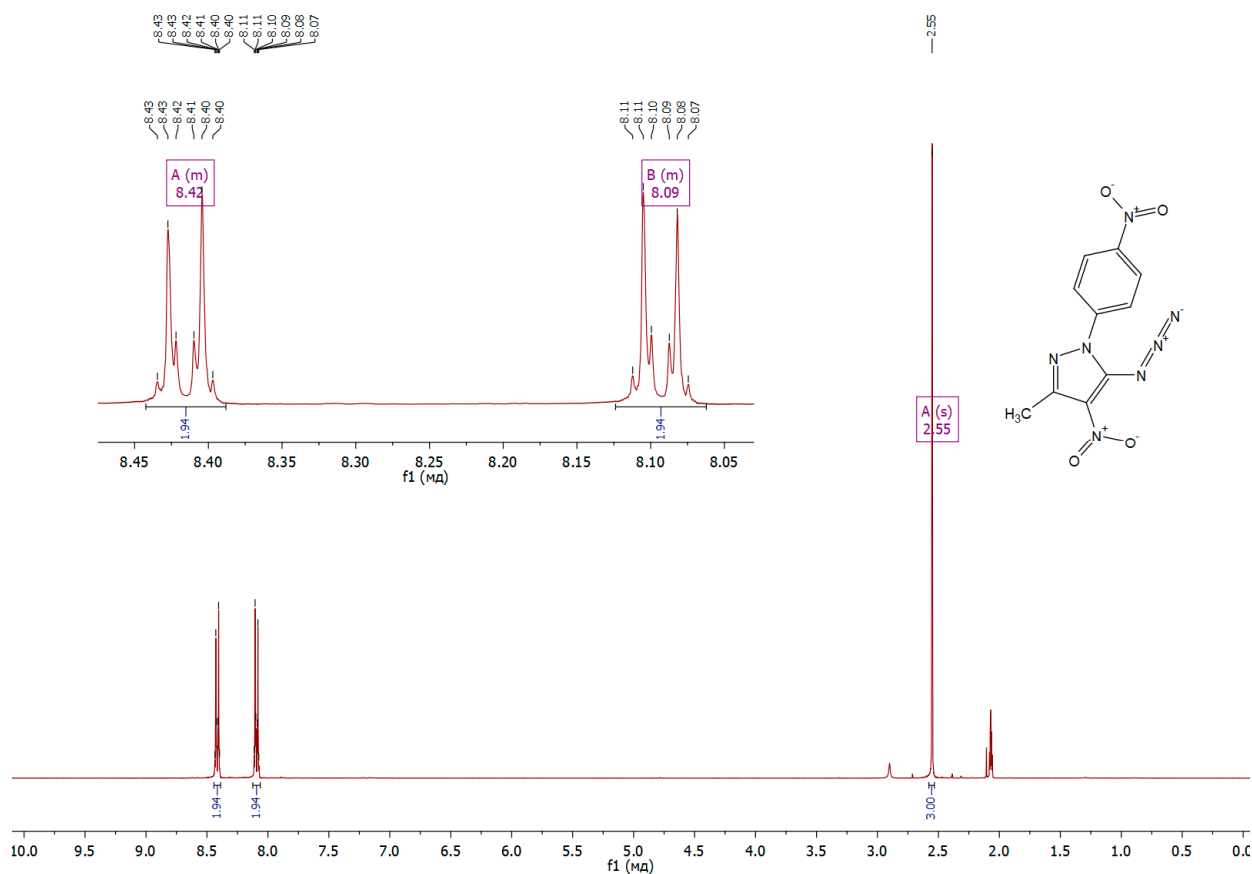

Figure S3. <sup>1</sup>H NMR spectrum of **4** (Acetone-*d*<sub>6</sub>, 500 MHz)

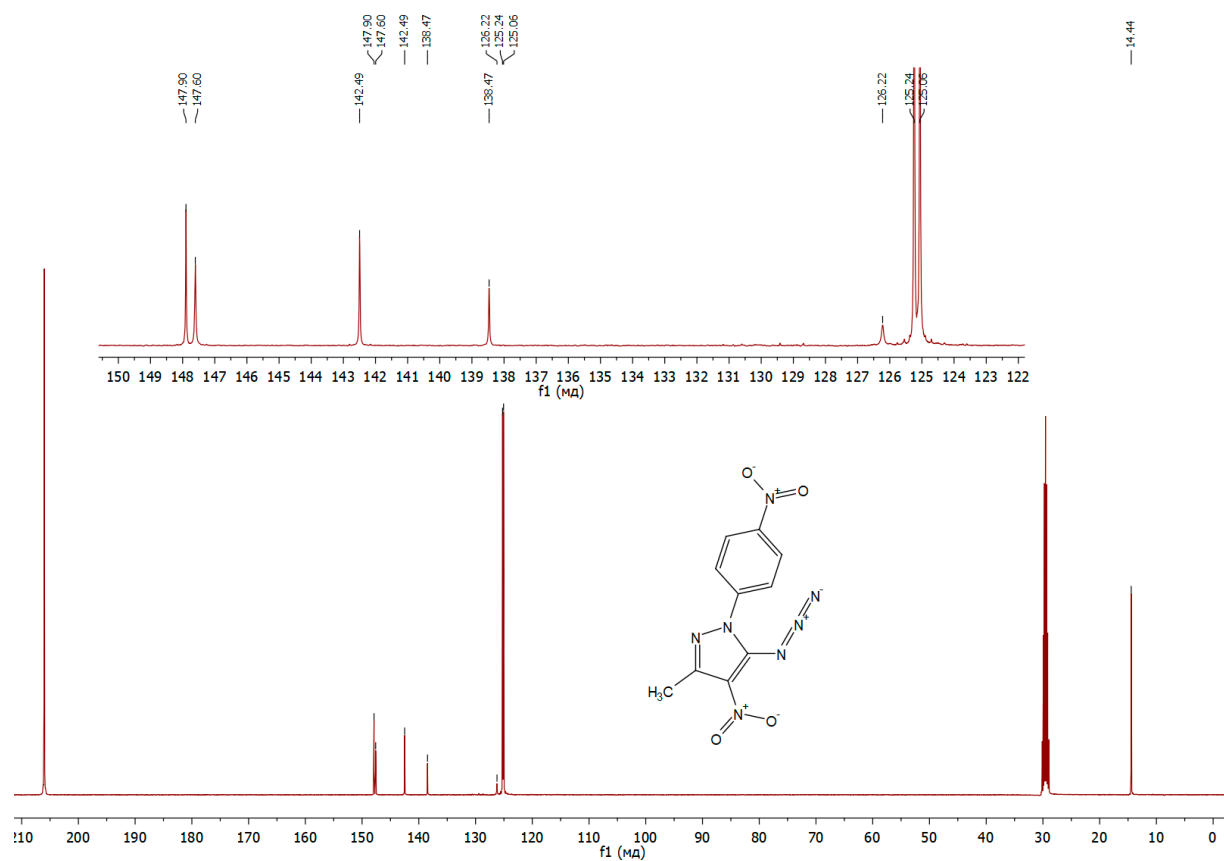

Figure S4. <sup>13</sup>C NMR spectrum of **4** (Acetone-*d*<sub>6</sub>, 101 MHz)

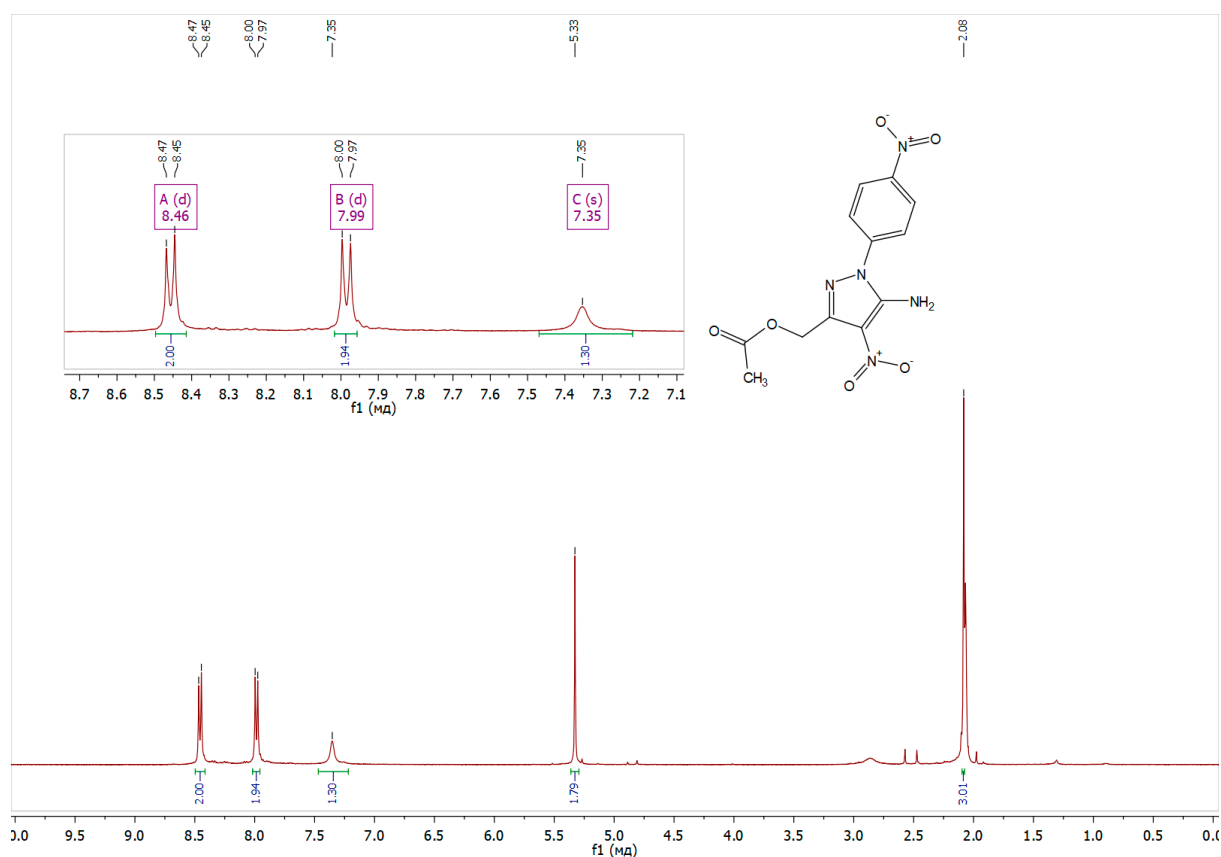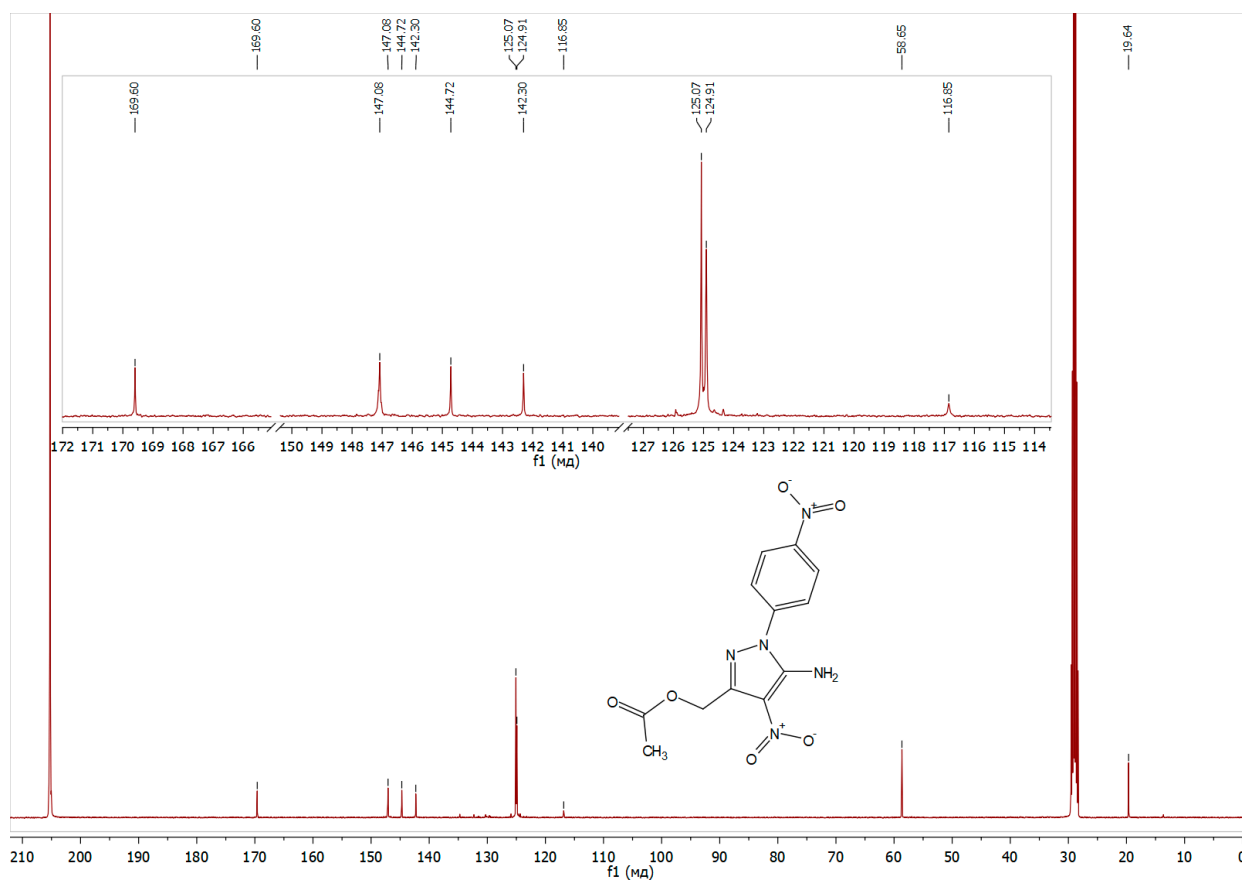

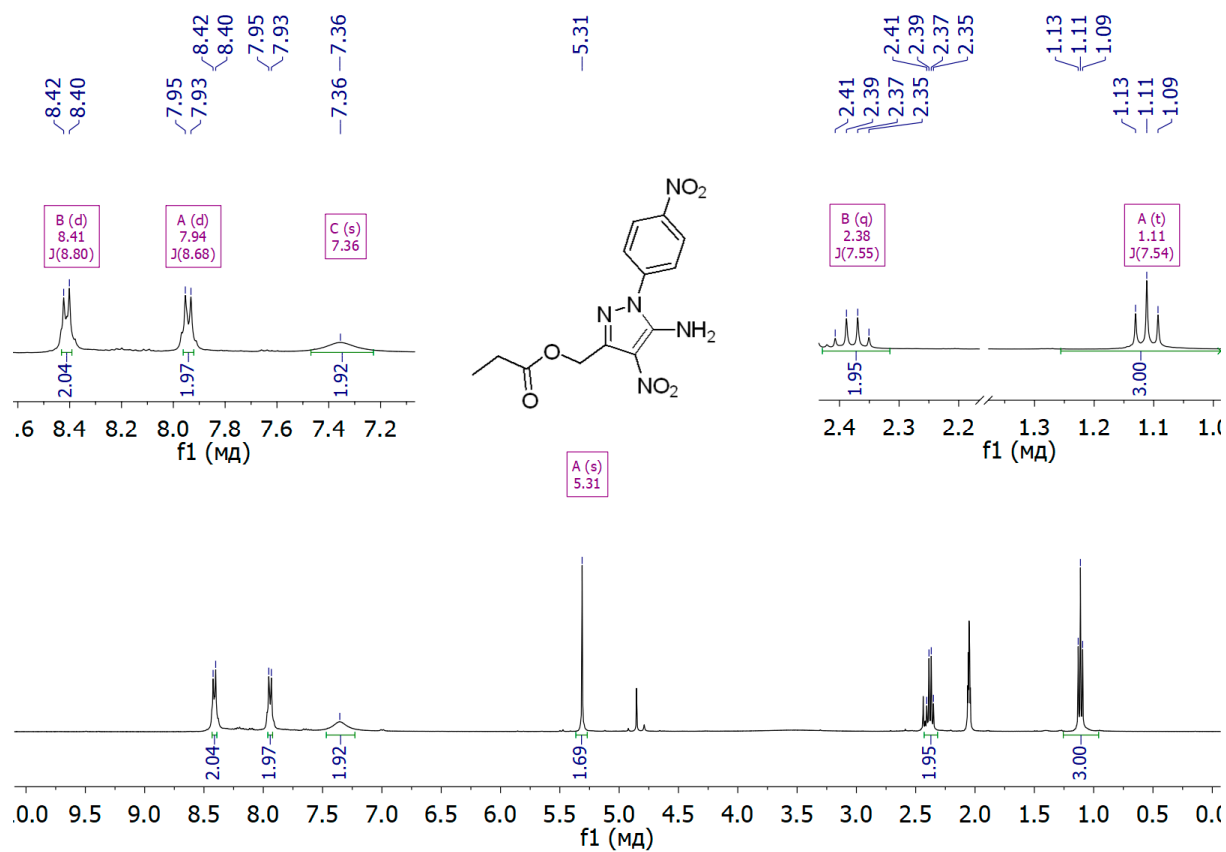

**Figure S7.** <sup>1</sup>H NMR spectrum of **5b** (Acetone-*d*<sub>6</sub>, 400 MHz)

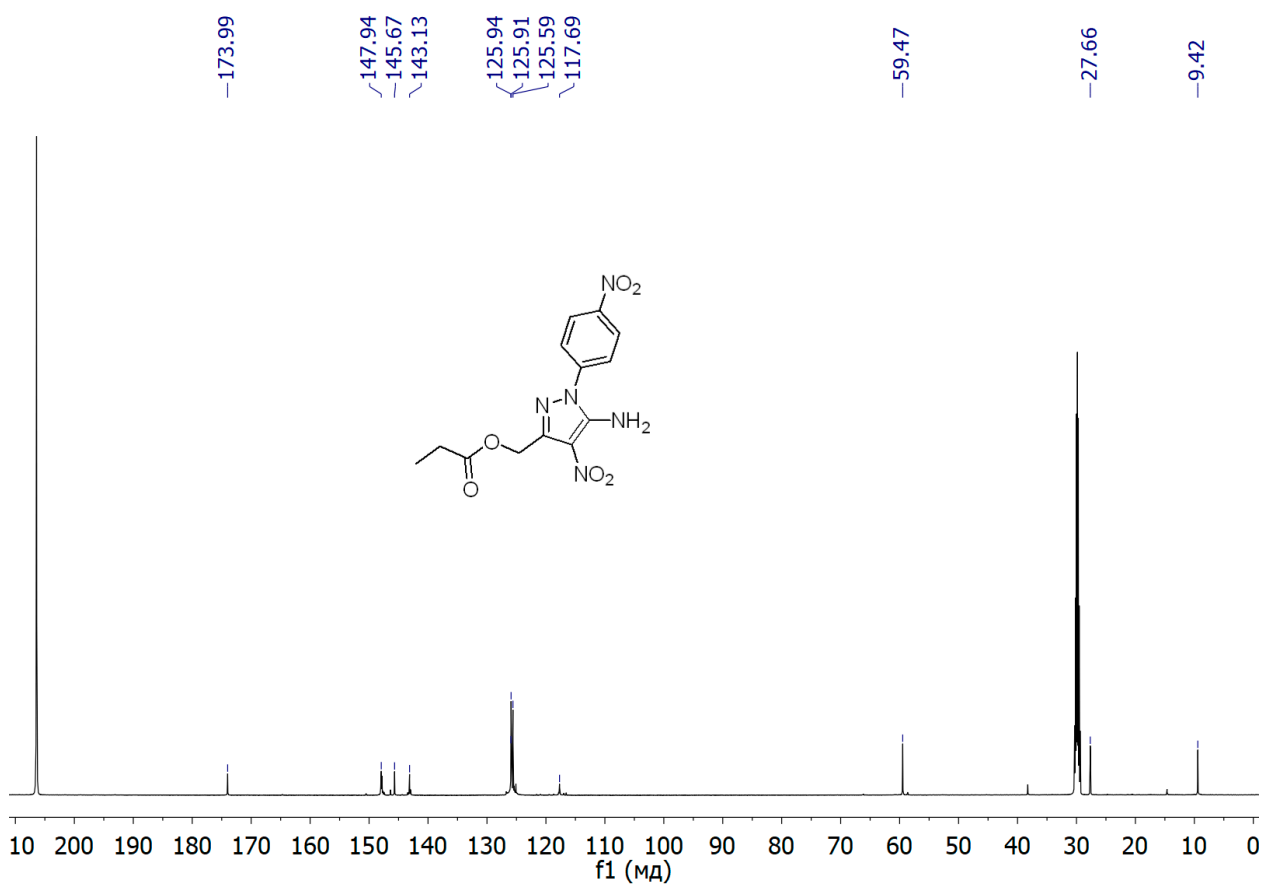

**Figure S8.** <sup>13</sup>C NMR spectrum of **5b** (Acetone-*d*<sub>6</sub>, 101 MHz)

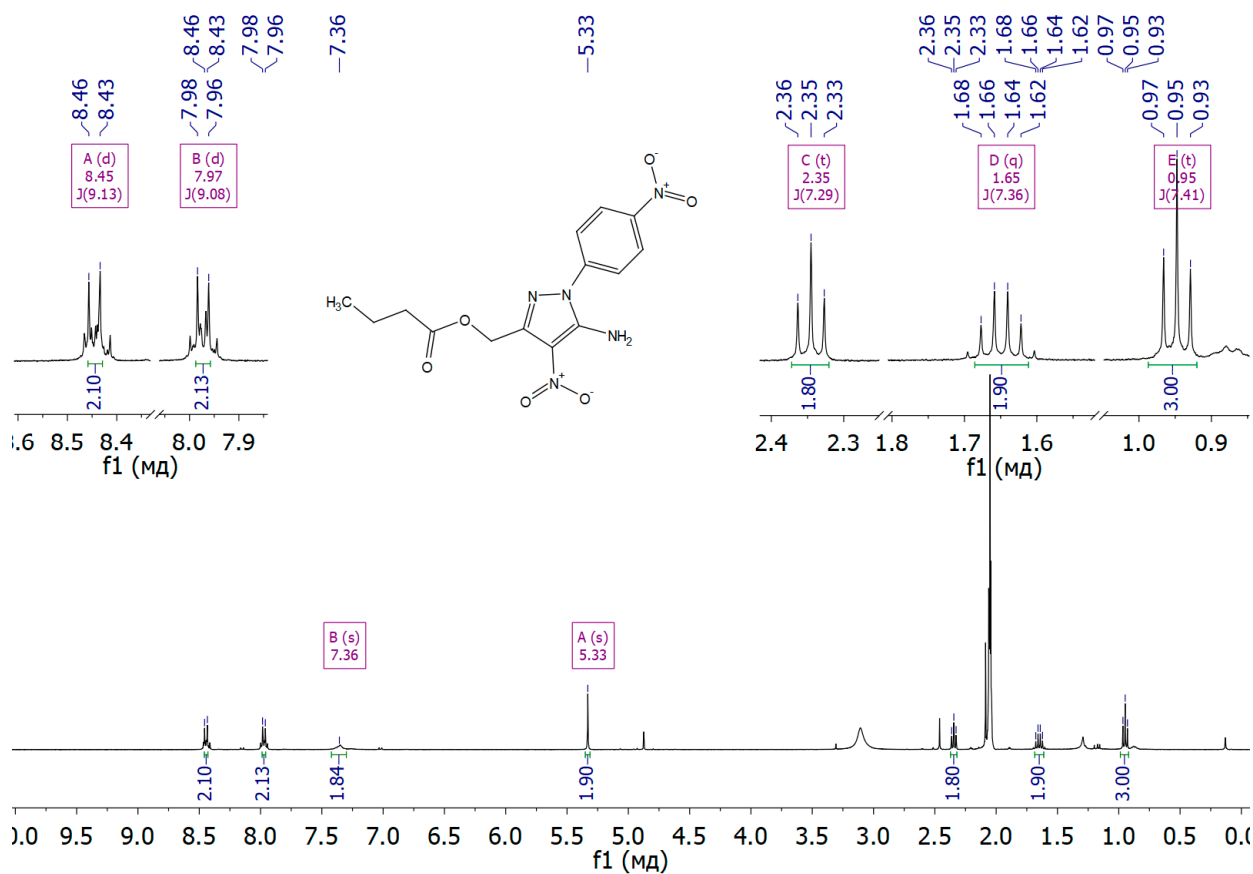

Figure S9. <sup>1</sup>H NMR spectrum of 5c (Acetone-*d*<sub>6</sub>, 600 MHz)

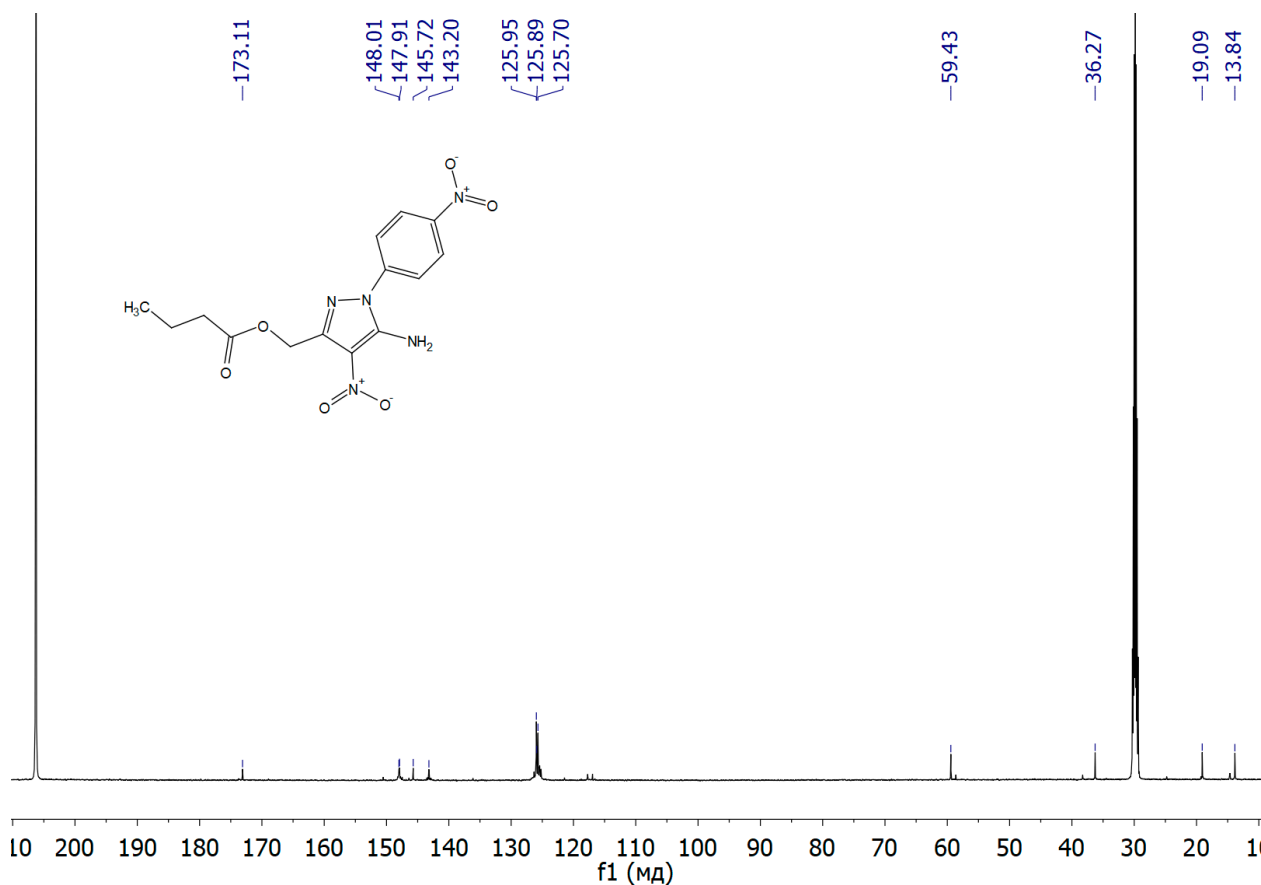

Figure S10. <sup>13</sup>C NMR spectrum of 5c (Acetone-*d*<sub>6</sub>, 126 MHz)



## The X-ray diffraction data

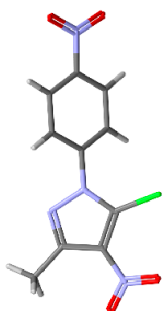

**Figure S13.** Molecular structure of compound 3

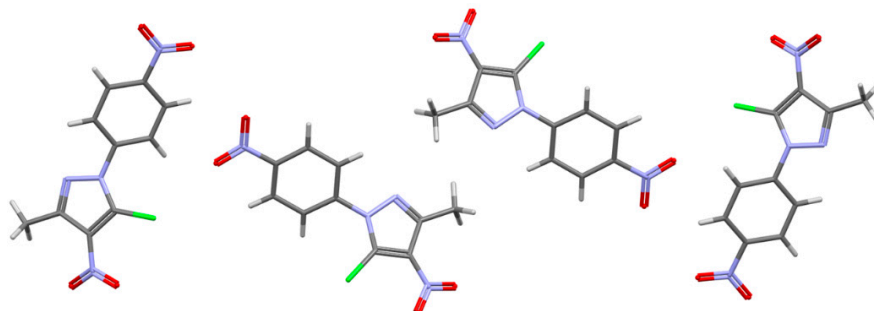

**Figure S14.** Unit cell of compound 3 (view along *a* axis)



## Computational details

**Computational Methods.** Initial transition state calculations were performed in autodE v. 1.3.5.<sup>1</sup> Low energy conformers were located with the ETKDGV3 algorithm<sup>2</sup> implemented in RDKit v. 2022.09.5 and optimized using XTB then with Gaussian16 (G16, Revision C.01).<sup>3</sup> Single point energies were performed at the PBE0/D3BJ level in combination with the def2-TZVP<sup>4</sup> basis set. All structures were fully optimized with G16 at the (U)M06-2X/ 6-31+G(d,p)/UF level of theory. The implicit SMD solvation model was used to simulate acetic acid. Harmonic frequencies were used to verify geometry minima (no imaginary frequency), or saddle points (one imaginary frequency). Three-dimensional structures were produced with CYLView.<sup>5</sup>

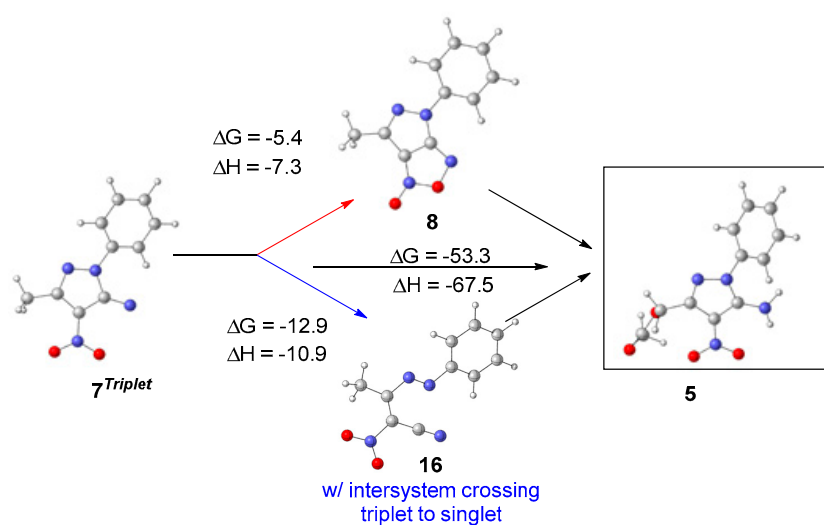

**Scheme S1.** The mechanistic study of the two possible pathways to lead to the same product 5. From pyrazole nitrene to intermediate 16, proceeds with intersystem crossing triplet to singlet.

There are two possible pathways that led to the observed product 5 from pyrazole nitrene. However, intermediate 16 can lead to formation of the byproduct 6. The following Schemes S2 and S3 outline the full proposed mechanism from intermediates 8 and 16.

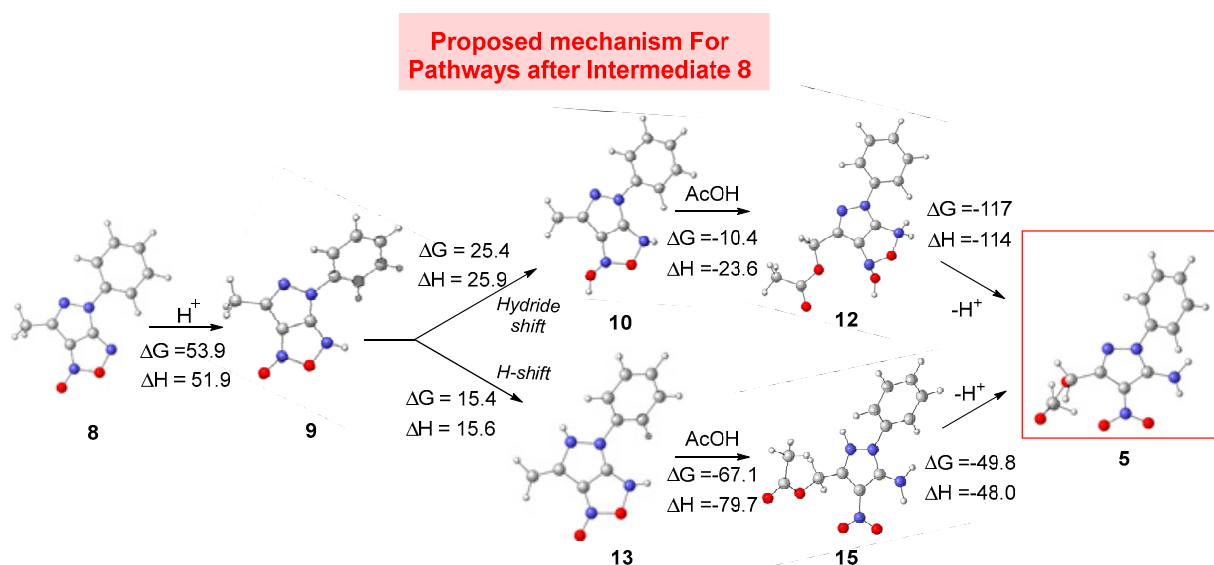

**Scheme S2.** Pathways from intermediate 8.

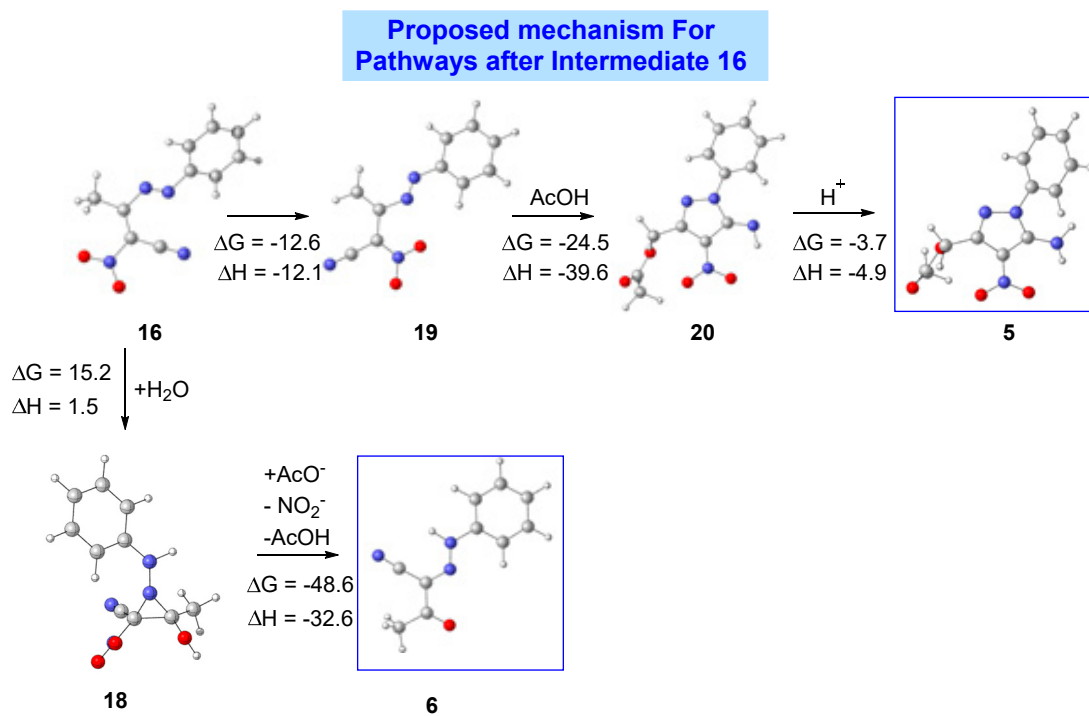

Scheme S3. Pathways from intermediate 16.

### XYZ Coordinates

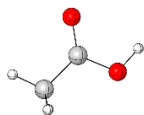

Acetic acid

Charge = 0

Multiplicity = 1

Imaginary Frequency = 0

Zero-point Energies = -228.944951

E = -228.940403

H = -228.939459

G = -228.9720468

symmetry cs

|   |              |              |              |
|---|--------------|--------------|--------------|
| C | 0.000000000  | 0.145939000  | 0.000000000  |
| C | -1.053899000 | -0.914374000 | 0.000000000  |
| O | -0.198918000 | 1.343956000  | 0.000000000  |
| O | 1.241110000  | -0.368992000 | 0.000000000  |
| H | -2.040494000 | -0.453759000 | 0.000000000  |
| H | -0.930515000 | -1.546984000 | 0.883285000  |
| H | -0.930515000 | -1.546984000 | -0.883285000 |
| H | 1.887383000  | 0.358623000  | 0.000000000  |

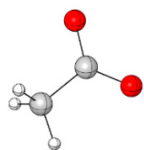**Acetic acid ion (-)**

Charge = -1

Multiplicity =1

Imaginary Frequency= 0

Zero-point Energies=-228.480458

E= -228.476949

H=-228.476005

G=-228.506304

symmetry cs

|   |              |              |              |
|---|--------------|--------------|--------------|
| C | 0.000000000  | 0.181713000  | 0.000000000  |
| C | -0.045154000 | -1.345334000 | 0.000000000  |
| O | -1.097340000 | 0.803276000  | 0.000000000  |
| O | 1.145255000  | 0.715251000  | 0.000000000  |
| H | -1.072043000 | -1.715833000 | 0.000000000  |
| H | 0.479824000  | -1.725330000 | 0.881841000  |
| H | 0.479824000  | -1.725330000 | -0.881841000 |

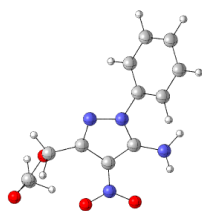**5 – Final Product**

Charge = 0

Multiplicity =1

Imaginary Frequency= 0

Zero-point Energies=-983.736945

E=-983.719150

H=-983.718205

G=-983.784259

symmetry c1

|   |              |              |              |
|---|--------------|--------------|--------------|
| N | 1.301927000  | 2.268498000  | 0.496110000  |
| C | 0.696506000  | 1.139772000  | 0.099635000  |
| C | -0.662886000 | 0.875089000  | -0.150509000 |
| N | -1.699661000 | 1.790365000  | -0.006979000 |
| O | -2.848078000 | 1.440791000  | -0.279683000 |
| O | -1.421185000 | 2.929863000  | 0.391007000  |
| C | -0.736729000 | -0.491533000 | -0.543258000 |
| C | -1.943352000 | -1.287483000 | -0.908731000 |
| O | -2.782934000 | -1.349155000 | 0.253118000  |
| C | -4.101740000 | -1.135113000 | 0.083705000  |
| C | -4.806500000 | -1.014219000 | 1.397970000  |
| O | -4.622971000 | -1.039977000 | -1.006766000 |
| N | 0.457215000  | -1.026032000 | -0.541867000 |
| N | 1.327459000  | -0.026281000 | -0.170130000 |
| C | 2.719709000  | -0.305914000 | -0.048770000 |
| C | 3.120392000  | -1.437889000 | 0.659120000  |
| C | 4.479404000  | -1.718952000 | 0.768442000  |

|   |              |              |              |
|---|--------------|--------------|--------------|
| C | 5.423262000  | -0.869146000 | 0.189994000  |
| C | 5.007311000  | 0.259194000  | -0.515149000 |
| C | 3.649108000  | 0.542590000  | -0.648723000 |
| H | 0.701703000  | 3.018204000  | 0.816454000  |
| H | -1.645510000 | -2.301307000 | -1.184773000 |
| H | -2.487600000 | -0.822076000 | -1.732516000 |
| H | -4.449836000 | -1.773978000 | 2.096053000  |
| H | -5.881749000 | -1.100198000 | 1.246997000  |
| H | -4.573665000 | -0.029097000 | 1.815665000  |
| H | 2.373159000  | -2.083399000 | 1.109490000  |
| H | 4.800743000  | -2.600603000 | 1.314025000  |
| H | 6.481889000  | -1.090209000 | 0.284169000  |
| H | 5.737759000  | 0.914604000  | -0.978863000 |
| H | 3.315072000  | 1.398428000  | -1.228215000 |
| H | 2.253888000  | 2.233232000  | 0.837807000  |

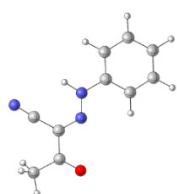

6 – Byproduct

Charge = 0

Multiplicity =1

Imaginary Frequency= 0

Zero-point Energies=-625.514691

E=-625.501904

H=-625.500960

G=-625.555762

symmetry c1

|   |              |              |              |
|---|--------------|--------------|--------------|
| N | -0.290885000 | 0.611125000  | 0.008579000  |
| N | 0.662910000  | -0.259384000 | 0.000469000  |
| C | -1.646447000 | 0.220000000  | 0.004560000  |
| C | 1.916710000  | 0.108043000  | 0.003383000  |
| C | 2.962213000  | -0.949047000 | -0.013944000 |
| C | 4.389512000  | -0.484662000 | -0.015672000 |
| O | 2.649684000  | -2.128252000 | -0.026795000 |
| C | -2.609766000 | 1.229391000  | -0.032666000 |
| C | -3.958257000 | 0.884176000  | -0.036582000 |
| C | -4.342659000 | -0.455763000 | -0.004642000 |
| C | -3.366308000 | -1.452615000 | 0.031863000  |
| C | -2.013448000 | -1.126517000 | 0.037223000  |
| C | 2.287824000  | 1.494090000  | 0.019696000  |
| N | 2.523870000  | 2.629610000  | 0.033929000  |
| H | -0.086344000 | 1.613735000  | 0.013182000  |
| H | 4.588012000  | 0.124762000  | 0.872856000  |
| H | 5.052514000  | -1.349622000 | -0.027652000 |
| H | 4.579581000  | 0.142719000  | -0.893553000 |
| H | -2.305607000 | 2.272643000  | -0.061274000 |
| H | -4.708334000 | 1.668399000  | -0.066046000 |
| H | -5.394741000 | -0.722088000 | -0.007872000 |
| H | -3.657366000 | -2.498228000 | 0.057455000  |
| H | -1.252700000 | -1.898337000 | 0.067110000  |

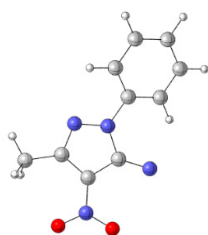

**7 - Pyrazole nitrene Triplet**

Charge = 0

Multiplicity =3

Imaginary Frequency= 0

Zero-point Energies= -754.685293

E=-754.672131

H=-754.671187

G=-754.727307

symmetry c1

|   |              |              |              |
|---|--------------|--------------|--------------|
| C | -1.732623000 | 0.094974000  | 0.036378000  |
| C | -2.486355000 | 1.137107000  | -0.503405000 |
| C | -3.871956000 | 1.017733000  | -0.530580000 |
| C | -4.491544000 | -0.129354000 | -0.033246000 |
| C | -3.721860000 | -1.159953000 | 0.504409000  |
| C | -2.334211000 | -1.052985000 | 0.551000000  |
| N | -0.314758000 | 0.224872000  | 0.066223000  |
| N | 0.256595000  | 1.420483000  | 0.213217000  |
| C | 1.588341000  | 1.247724000  | 0.172040000  |
| C | 1.865710000  | -0.107154000 | -0.011770000 |
| C | 0.618392000  | -0.791112000 | -0.095694000 |
| C | 2.512015000  | 2.402605000  | 0.321944000  |
| N | 3.127206000  | -0.733279000 | -0.113547000 |
| O | 3.152934000  | -1.947739000 | -0.277814000 |
| O | 4.126565000  | -0.027083000 | -0.033039000 |
| N | 0.332470000  | -2.049437000 | -0.316260000 |
| H | -1.989154000 | 2.015801000  | -0.899318000 |
| H | -4.467365000 | 1.821566000  | -0.951575000 |
| H | -5.572923000 | -0.218143000 | -0.061771000 |
| H | -4.199525000 | -2.048416000 | 0.904494000  |
| H | -1.737997000 | -1.839052000 | 1.003075000  |
| H | 1.928794000  | 3.315777000  | 0.448326000  |
| H | 3.153041000  | 2.494773000  | -0.558897000 |
| H | 3.163105000  | 2.260290000  | 1.188610000  |

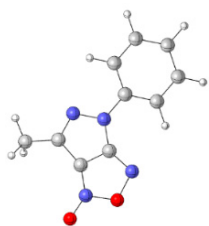

**8 – Bicyclic Intermediate (C<sub>10</sub>N<sub>4</sub>H<sub>8</sub>O<sub>2</sub>)**

Charge = 0

Multiplicity =1

Imaginary Frequency= 0

Zero-point Energies=-754.696140

E= -754.683765

H= -754.682821

G= -754.735967

symmetry c1

|   |              |              |              |
|---|--------------|--------------|--------------|
| C | -3.199404000 | -1.263677000 | -1.540607000 |
| C | -2.162699000 | -0.538087000 | -0.763299000 |
| C | -2.325631000 | 0.555310000  | 0.162520000  |
| C | -1.038228000 | 0.882497000  | 0.631965000  |
| N | -1.038857000 | 1.873703000  | 1.489444000  |
| O | -2.382752000 | 2.205639000  | 1.581042000  |
| N | -3.157238000 | 1.384920000  | 0.758798000  |
| O | -4.370971000 | 1.574028000  | 0.746084000  |
| N | -0.887197000 | -0.812850000 | -0.819748000 |
| N | -0.175392000 | 0.029346000  | 0.014467000  |
| C | 1.229286000  | -0.056755000 | 0.129061000  |
| C | 1.886763000  | 0.773424000  | 1.039227000  |
| C | 3.272989000  | 0.693619000  | 1.149246000  |
| C | 3.997460000  | -0.203457000 | 0.366663000  |
| C | 3.323267000  | -1.027173000 | -0.534822000 |
| C | 1.938806000  | -0.962093000 | -0.662062000 |
| H | -3.735977000 | -0.570397000 | -2.194603000 |
| H | -3.927775000 | -1.721108000 | -0.865057000 |
| H | -2.729063000 | -2.040402000 | -2.145043000 |
| H | 1.331471000  | 1.473211000  | 1.655749000  |
| H | 3.783660000  | 1.339940000  | 1.856371000  |
| H | 5.077351000  | -0.260519000 | 0.458075000  |
| H | 3.876732000  | -1.730021000 | -1.150079000 |
| H | 1.413498000  | -1.599299000 | -1.363293000 |

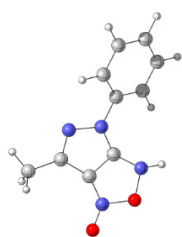

**9 – Intermediate ion (+)**

Zero-point Energies= -755.076982

E= -755.064470

H= -755.063526

G= -755.116161

Charge = 1

Multiplicity =1

Imaginary Frequency= 0

symmetry c1

|   |              |              |              |
|---|--------------|--------------|--------------|
| C | 3.159455000  | 1.995846000  | 1.002161000  |
| C | 2.131331000  | 0.993331000  | 0.635918000  |
| C | 2.307939000  | -0.354066000 | 0.149287000  |
| C | 1.026269000  | -0.875494000 | -0.035864000 |
| N | 1.098478000  | -2.150651000 | -0.474141000 |
| O | 2.455244000  | -2.393073000 | -0.712683000 |
| N | 3.178081000  | -1.264320000 | -0.289806000 |
| O | 4.366225000  | -1.329671000 | -0.367301000 |
| N | 0.845138000  | 1.201529000  | 0.721491000  |
| N | 0.156147000  | 0.056201000  | 0.312269000  |
| C | -1.271886000 | 0.028893000  | 0.289336000  |
| C | -1.924399000 | -1.180343000 | 0.515697000  |
| C | -3.315974000 | -1.205000000 | 0.470725000  |
| C | -4.030750000 | -0.034505000 | 0.220615000  |
| C | -3.354777000 | 1.167761000  | 0.011418000  |
| C | -1.963611000 | 1.210383000  | 0.039137000  |
| H | 2.672147000  | 2.916017000  | 1.325418000  |
| H | 3.802244000  | 2.204573000  | 0.142429000  |
| H | 3.786212000  | 1.609935000  | 1.810788000  |
| H | 0.530574000  | -2.534943000 | -1.237025000 |
| H | -1.365246000 | -2.081603000 | 0.753138000  |
| H | -3.838382000 | -2.139239000 | 0.648713000  |
| H | -5.115502000 | -0.057769000 | 0.194517000  |
| H | -3.910380000 | 2.079763000  | -0.181171000 |
| H | -1.424578000 | 2.136344000  | -0.128465000 |

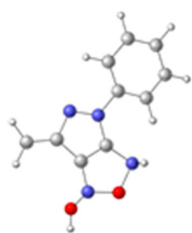

**10 – intermediate ion (+)**

Charge = 1

Multiplicity =1

Imaginary Frequency= 0

Zero-point Energies=-755.035747

E= -755.023233

H= -755.022289

G= -755.075621

symmetry c1

|   |              |              |              |
|---|--------------|--------------|--------------|
| C | -2.295423000 | 2.776413000  | -0.080972000 |
| C | -1.578399000 | 1.632313000  | 0.028217000  |
| C | -1.938754000 | 0.260405000  | 0.229880000  |
| C | -0.791853000 | -0.431532000 | 0.235316000  |
| N | -0.980710000 | -1.808585000 | 0.297496000  |
| O | -2.406027000 | -1.831583000 | 0.682688000  |
| N | -3.046682000 | -0.627823000 | 0.285049000  |
| O | -3.465451000 | -0.773402000 | -1.048554000 |
| N | -0.186100000 | 1.683442000  | -0.067807000 |
| N | 0.248260000  | 0.474640000  | 0.036423000  |
| C | 1.643214000  | 0.166399000  | -0.013268000 |
| C | 2.566026000  | 1.181430000  | 0.238910000  |
| C | 3.917396000  | 0.868534000  | 0.172644000  |
| C | 4.327303000  | -0.429778000 | -0.140330000 |
| C | 3.385086000  | -1.426550000 | -0.390171000 |
| C | 2.025944000  | -1.136865000 | -0.326962000 |
| H | -3.379698000 | 2.757262000  | -0.026009000 |
| H | -1.781776000 | 3.722505000  | -0.227153000 |
| H | -0.538461000 | -2.246264000 | 1.112946000  |
| H | -4.400027000 | -1.031306000 | -0.983285000 |
| H | 2.230447000  | 2.181202000  | 0.489951000  |
| H | 4.652907000  | 1.640555000  | 0.371241000  |
| H | 5.385897000  | -0.663869000 | -0.188978000 |
| H | 3.703226000  | -2.432210000 | -0.642855000 |
| H | 1.292697000  | -1.904333000 | -0.556649000 |



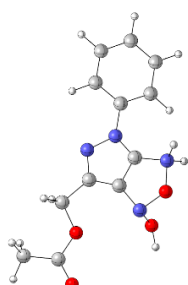

**12 – Intermediate ion (+)**

Charge = 1

Multiplicity =1

Imaginary Frequency= 0

Zero-point Energies=-984.017563

E=-984.000225

H=-983.999281

G=-984.064255

symmetry c1

|   |              |              |              |
|---|--------------|--------------|--------------|
| C | -0.827485000 | -0.674562000 | -0.098112000 |
| C | -0.694948000 | 0.712151000  | -0.279674000 |
| C | 0.636848000  | 0.943983000  | -0.211869000 |
| O | -0.395326000 | 2.834402000  | -0.833919000 |
| N | -1.433068000 | 1.927053000  | -0.417993000 |
| O | -1.822442000 | 2.300863000  | 0.857106000  |
| N | 0.379949000  | -1.210054000 | 0.052003000  |
| N | 1.289457000  | -0.211251000 | -0.016859000 |
| C | 2.691764000  | -0.469625000 | 0.062411000  |
| C | 3.182032000  | -1.667918000 | -0.449982000 |
| C | 4.550506000  | -1.911022000 | -0.379222000 |
| C | 5.409801000  | -0.964720000 | 0.180202000  |
| C | 4.898676000  | 0.228240000  | 0.687855000  |
| C | 3.529082000  | 0.479625000  | 0.642270000  |
| H | -2.650496000 | 2.796860000  | 0.733914000  |
| H | 2.502833000  | -2.386789000 | -0.894783000 |
| H | 4.946015000  | -2.841592000 | -0.773057000 |
| H | 6.476222000  | -1.160475000 | 0.226132000  |
| H | 5.560757000  | 0.959505000  | 1.139786000  |
| H | 3.127347000  | 1.384934000  | 1.089109000  |
| C | -2.080844000 | -1.485908000 | -0.069246000 |
| H | -2.049122000 | -2.200431000 | 0.758101000  |
| H | -2.209438000 | -2.020415000 | -1.015714000 |
| O | -3.124220000 | -0.527219000 | 0.111135000  |
| C | -4.421927000 | -0.904062000 | 0.141621000  |
| O | -5.246590000 | -0.027675000 | 0.277549000  |
| C | -4.744776000 | -2.360996000 | 0.009373000  |
| H | -4.400558000 | -2.742169000 | -0.956783000 |
| H | -4.252596000 | -2.937161000 | 0.798086000  |
| H | -5.823937000 | -2.482520000 | 0.085043000  |
| N | 0.904915000  | 2.350544000  | -0.369769000 |
| H | 1.165192000  | 2.841826000  | 0.502988000  |
| H | 1.555268000  | 2.600303000  | -1.133215000 |

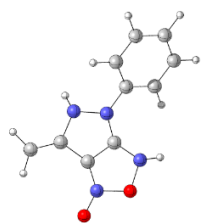**13 – intermediate ion (+)**

Charge = 1

Multiplicity =1

Imaginary Frequency= 0

Zero-point Energies=-755.052196

E=-755.039688

H=-755.038743

G=-755.091591

symmetry c1

|   |              |              |              |
|---|--------------|--------------|--------------|
| C | 2.578090000  | 2.599780000  | 0.221118000  |
| C | 1.722531000  | 1.579792000  | 0.176512000  |
| C | 1.964572000  | 0.152772000  | 0.099256000  |
| C | 0.723704000  | -0.505824000 | 0.087973000  |
| N | 0.905146000  | -1.833113000 | -0.044088000 |
| O | 2.282417000  | -2.023887000 | -0.249025000 |
| N | 2.900954000  | -0.729491000 | -0.152491000 |
| O | 4.100981000  | -0.702413000 | -0.281274000 |
| N | 0.279945000  | 1.681983000  | 0.171943000  |
| N | -0.257038000 | 0.358157000  | 0.168076000  |
| C | -1.660753000 | 0.147199000  | 0.072294000  |
| C | -2.185034000 | -1.057254000 | 0.540506000  |
| C | -3.554836000 | -1.274019000 | 0.425588000  |
| C | -4.379122000 | -0.294539000 | -0.128111000 |
| C | -3.833799000 | 0.910359000  | -0.570352000 |
| C | -2.464539000 | 1.144245000  | -0.476557000 |
| H | 3.643792000  | 2.402992000  | 0.231117000  |
| H | 2.224066000  | 3.623960000  | 0.254641000  |
| H | 0.360982000  | -2.418232000 | -0.686674000 |
| H | -1.550952000 | -1.800947000 | 1.014955000  |
| H | -3.977432000 | -2.206081000 | 0.785898000  |
| H | -5.447192000 | -0.468361000 | -0.208729000 |
| H | -4.473904000 | 1.674508000  | -0.999002000 |
| H | -2.027615000 | 2.070220000  | -0.833461000 |
| H | -0.086861000 | 2.174535000  | 0.990206000  |

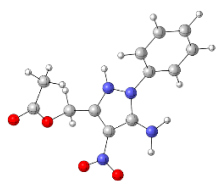

**15 – Intermediate ion (+)**

Charge = 1

Multiplicity =1

Imaginary Frequency= 0

Zero-point Energies=-984.123698

E= -984.106145

H=-984.105201

G=-984.170620

symmetry c1

|   |              |              |              |
|---|--------------|--------------|--------------|
| N | 0.290765000  | 0.618360000  | 0.006193000  |
| N | -0.661404000 | -0.251608000 | 0.078220000  |
| C | 1.646455000  | 0.224816000  | -0.001264000 |
| C | -1.915769000 | 0.112183000  | 0.045088000  |
| C | -2.960260000 | -0.942860000 | 0.131492000  |
| C | -4.385473000 | -0.495693000 | -0.018997000 |
| O | -2.649469000 | -2.107778000 | 0.318095000  |
| C | 2.610102000  | 1.222944000  | 0.149325000  |
| C | 3.957904000  | 0.875494000  | 0.142049000  |
| C | 4.340514000  | -0.457137000 | -0.007417000 |
| C | 3.363968000  | -1.443143000 | -0.157191000 |
| C | 2.011970000  | -1.112703000 | -0.161499000 |
| C | -2.288689000 | 1.492740000  | -0.073881000 |
| N | -2.527911000 | 2.630633000  | -0.170094000 |
| H | 0.084981000  | 1.616168000  | -0.088309000 |
| H | -4.512340000 | 0.081628000  | -0.940655000 |
| H | -5.039365000 | -1.367647000 | -0.029454000 |
| H | -4.656670000 | 0.157246000  | 0.818751000  |
| H | 2.304600000  | 2.258755000  | 0.272499000  |
| H | 4.708592000  | 1.650925000  | 0.258741000  |
| H | 5.391997000  | -0.725898000 | -0.009754000 |
| H | 3.654522000  | -2.481999000 | -0.279928000 |
| H | 1.250299000  | -1.874333000 | -0.285177000 |

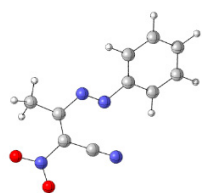**16 - Intermediate**

Charge = 0

Multiplicity =1

Imaginary Frequency= 0

Zero-point Energies= -754.703640

E= -754.689467

G= -754.688523

H= -754.747241

symmetry c1

|   |              |              |              |
|---|--------------|--------------|--------------|
| C | -2.020548000 | 0.126608000  | 0.241756000  |
| C | -2.641478000 | 0.875860000  | -0.766815000 |
| C | -4.006322000 | 0.727139000  | -0.966339000 |
| C | -4.744451000 | -0.157750000 | -0.170688000 |
| C | -4.119457000 | -0.898245000 | 0.830668000  |
| C | -2.750339000 | -0.755075000 | 1.041234000  |
| N | -0.632943000 | 0.178992000  | 0.530635000  |
| N | 0.036299000  | 0.954497000  | -0.173785000 |
| C | 1.421851000  | 0.962594000  | 0.061096000  |
| C | 2.093878000  | -0.209744000 | -0.091201000 |
| C | 1.459481000  | -1.448781000 | -0.419552000 |
| C | 1.978655000  | 2.314575000  | 0.349011000  |
| N | 3.539461000  | -0.302576000 | 0.006080000  |
| O | 4.031335000  | -1.413406000 | -0.111898000 |
| O | 4.178541000  | 0.717518000  | 0.201310000  |
| N | 0.946580000  | -2.443951000 | -0.710554000 |
| H | -2.057798000 | 1.558151000  | -1.375697000 |
| H | -4.503140000 | 1.299286000  | -1.743492000 |
| H | -5.812029000 | -0.266423000 | -0.336968000 |
| H | -4.694161000 | -1.584124000 | 1.444415000  |
| H | -2.232168000 | -1.319118000 | 1.811079000  |
| H | 1.153946000  | 3.021635000  | 0.444418000  |
| H | 2.649916000  | 2.636298000  | -0.452738000 |
| H | 2.563030000  | 2.289573000  | 1.272043000  |

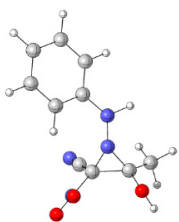**18 - Intermediate**

Charge = 0

Multiplicity =1

Imaginary Frequency= 0

Zero-point Energies=-831.081693

E=-831.066448

H=-831.065504

G=-831.124547

symmetry c1

|   |              |              |              |
|---|--------------|--------------|--------------|
| N | 0.497811000  | 1.203618000  | -0.141750000 |
| N | -0.572139000 | 0.458063000  | -0.702078000 |
| C | 1.740180000  | 0.521791000  | -0.182475000 |
| C | -1.880832000 | 1.019686000  | -0.554513000 |
| C | -1.425318000 | -0.173365000 | 0.294933000  |
| C | -2.127209000 | 2.341013000  | 0.118416000  |
| O | -2.660432000 | 0.736856000  | -1.647715000 |
| C | 2.897968000  | 1.272020000  | 0.057974000  |
| C | 4.135500000  | 0.641672000  | 0.094218000  |
| C | 4.234573000  | -0.739218000 | -0.096183000 |
| C | 3.078904000  | -1.477761000 | -0.331267000 |
| C | 1.828665000  | -0.857666000 | -0.378340000 |
| N | -1.889172000 | -1.537907000 | -0.053218000 |
| O | -1.694888000 | -1.938946000 | -1.177590000 |
| O | -2.481419000 | -2.139052000 | 0.827202000  |
| C | -1.185838000 | -0.005191000 | 1.706064000  |
| N | -0.976587000 | 0.160999000  | 2.829761000  |
| H | 0.537099000  | 2.106579000  | -0.611696000 |
| H | -1.956462000 | 3.135238000  | -0.614175000 |
| H | -3.167497000 | 2.385216000  | 0.450897000  |
| H | -1.473179000 | 2.493492000  | 0.977419000  |
| H | -3.576077000 | 1.007843000  | -1.479221000 |
| H | 2.818899000  | 2.344166000  | 0.219127000  |
| H | 5.028272000  | 1.232540000  | 0.276583000  |
| H | 5.202262000  | -1.229368000 | -0.062495000 |
| H | 3.139679000  | -2.550836000 | -0.487033000 |
| H | 0.941957000  | -1.447034000 | -0.586539000 |

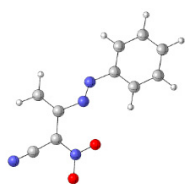

**19 – Intermediate ion (-)**

Charge = -1

Multiplicity =1

Imaginary Frequency= 0

Zero-point Energies= -754.258985

E= -754.245328

G= -754.244384

H= -754.301627

symmetry c1

|   |              |              |              |
|---|--------------|--------------|--------------|
| N | 0.824295000  | -0.886408000 | 0.436185000  |
| N | -0.101837000 | -0.428088000 | -0.248210000 |
| C | 2.107105000  | -0.342231000 | 0.118610000  |
| C | -1.386336000 | -0.995304000 | 0.040130000  |
| C | -1.535358000 | -2.322396000 | 0.166840000  |
| C | -2.501575000 | -0.055154000 | -0.040984000 |
| N | -2.396641000 | 1.224538000  | 0.405862000  |
| C | -3.763546000 | -0.457902000 | -0.526306000 |
| O | -3.366005000 | 2.016247000  | 0.272027000  |
| O | -1.332621000 | 1.609421000  | 0.951027000  |
| N | -4.785499000 | -0.841119000 | -0.929752000 |
| C | 2.274653000  | 0.911377000  | -0.478806000 |
| C | 3.561681000  | 1.375919000  | -0.728353000 |
| C | 4.672378000  | 0.597757000  | -0.389944000 |
| C | 4.496337000  | -0.644894000 | 0.218115000  |
| C | 3.211142000  | -1.110507000 | 0.488090000  |
| H | -0.678731000 | -2.981282000 | 0.078667000  |
| H | -2.517453000 | -2.762325000 | 0.307899000  |
| H | 1.401751000  | 1.510268000  | -0.718256000 |
| H | 3.701510000  | 2.352474000  | -1.182249000 |
| H | 5.673838000  | 0.967684000  | -0.589096000 |
| H | 5.358004000  | -1.246509000 | 0.490968000  |
| H | 3.048971000  | -2.068113000 | 0.974678000  |

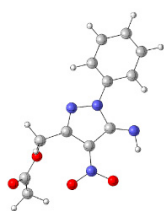

**20 – Intermediate ion (-)**

Charge = -1

Multiplicity =1

Imaginary Frequency= 0

Zero-point Energies=-983.265217

E=-983.247947

H= -983.247003

G= -983.312672

symmetry c1

|   |              |              |              |
|---|--------------|--------------|--------------|
| N | -1.312489000 | -2.470978000 | 0.380485000  |
| C | -0.635667000 | -1.439070000 | 0.000112000  |
| C | 0.756769000  | -1.237943000 | -0.358605000 |
| N | 1.709006000  | -2.201453000 | -0.400865000 |
| O | 2.877844000  | -1.914618000 | -0.758902000 |
| O | 1.409425000  | -3.378554000 | -0.080507000 |
| C | 0.913087000  | 0.148968000  | -0.665795000 |
| C | 2.144828000  | 0.875779000  | -1.085308000 |
| O | 3.078509000  | 0.803639000  | 0.005670000  |
| C | 4.356311000  | 0.510383000  | -0.280489000 |
| C | 5.136884000  | 0.202778000  | 0.959318000  |
| O | 4.800737000  | 0.490950000  | -1.410371000 |
| N | -0.216031000 | 0.780007000  | -0.529577000 |
| N | -1.166680000 | -0.148155000 | -0.153384000 |
| C | -2.469947000 | 0.307034000  | 0.122697000  |
| C | -2.679132000 | 1.673878000  | 0.360934000  |
| C | -3.962063000 | 2.146544000  | 0.617174000  |
| C | -5.051139000 | 1.274814000  | 0.647392000  |
| C | -4.836961000 | -0.081265000 | 0.409675000  |
| C | -3.560027000 | -0.573296000 | 0.143865000  |
| H | -0.668047000 | -3.258854000 | 0.421539000  |
| H | 1.908258000  | 1.925436000  | -1.274987000 |
| H | 2.589052000  | 0.425750000  | -1.974411000 |
| H | 4.878602000  | 0.899254000  | 1.759306000  |
| H | 6.203747000  | 0.238428000  | 0.742013000  |
| H | 4.862155000  | -0.806726000 | 1.282850000  |
| H | -1.836066000 | 2.353706000  | 0.343790000  |
| H | -4.106646000 | 3.207393000  | 0.801241000  |
| H | -6.049931000 | 1.647778000  | 0.852531000  |
| H | -5.672895000 | -0.774995000 | 0.423508000  |
| H | -3.401593000 | -1.626513000 | -0.040499000 |

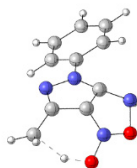

### 9 → 10 Transition State

Charge = 0

Multiplicity = 1

Imaginary Frequency = 1 (-1312.0817)

Zero-point Energies = -754.703640

E = -754.689467

H = -754.688523

G = -754.747241

symmetry c1

|   |              |              |              |
|---|--------------|--------------|--------------|
| C | 2.778990000  | 2.136566000  | -0.052553000 |
| C | 1.706526000  | 1.353440000  | -0.486523000 |
| C | 1.885215000  | -0.084263000 | -0.649572000 |
| C | 0.622456000  | -0.671832000 | -0.523928000 |
| N | 0.771602000  | -1.958670000 | -0.002568000 |
| O | 2.125891000  | -1.907422000 | 0.619794000  |
| N | 2.715590000  | -0.770881000 | 0.097188000  |
| O | 3.698583000  | -0.228227000 | 0.703669000  |
| N | 0.378828000  | 1.571344000  | -0.430801000 |
| N | -0.226961000 | 0.347158000  | -0.392653000 |
| C | -1.624608000 | 0.223661000  | -0.175258000 |
| C | -2.311350000 | 1.261372000  | 0.456460000  |
| C | -3.667445000 | 1.089759000  | 0.704189000  |
| C | -4.311334000 | -0.094020000 | 0.334725000  |
| C | -3.606835000 | -1.115746000 | -0.302825000 |
| C | -2.252152000 | -0.959648000 | -0.574824000 |
| H | 3.385910000  | 0.890148000  | 0.769340000  |
| H | 2.567940000  | 3.074540000  | 0.449784000  |
| H | 3.731527000  | 2.058138000  | -0.575637000 |
| H | 0.135895000  | -2.187853000 | 0.769196000  |
| H | -1.785886000 | 2.164245000  | 0.744685000  |
| H | -4.223898000 | 1.880648000  | 1.194582000  |
| H | -5.370489000 | -0.215370000 | 0.534618000  |
| H | -4.115731000 | -2.021551000 | -0.612700000 |
| H | -1.711254000 | -1.716147000 | -1.139083000 |



## References

- (1) Young, T. A.; Silcock, J. J.; Sterling, A. J.; Duarte, F. autodE: Automated Calculation of Reaction Energy Profiles— Application to Organic and Organometallic Reactions. *Angew. Chem. Int. Ed.***2021**, 60 (8), 4266–4274. <https://doi.org/10.1002/anie.202011941>.
- (2) Riniker, S.; Landrum, G. A. Better Informed Distance Geometry: Using What We Know To Improve Conformation Generation. *J. Chem. Inf. Model.***2015**, 55 (12), 2562–2574. <https://doi.org/10.1021/acs.jcim.5b00654>.
- (3) Gaussian 16, Revision C.01, Frisch, M. J.; Trucks, G. W.; Schlegel, H. B.; Scuseria, G. E.; Robb, M. A.; Cheeseman, J. R.; Scalmani, G.; Barone, V.; Petersson, G. A.; Nakatsuji, H.; Li, X.; Caricato, M.; Marenich, A. V.; Bloino, J.; Janesko, B. G.; Gomperts, R.; Mennucci, B.; Hratchian, H. P.; Ortiz, J. V.; Izmaylov, A. F.; Sonnenberg, J. L.; Williams-Young, D.; Ding, F.; Lipparini, F.; Egidi, F.; Goings, J.; Peng, B.; Petrone, A.; Henderson, T.; Ranasinghe, D.; Zakrzewski, V. G.; Gao, J.; Rega, N.; Zheng, G.; Liang, W.; Hada, M.; Ehara, M.; Toyota, K.; Fukuda, R.; Hasegawa, J.; Ishida, M.; Nakajima, T.; Honda, Y.; Kitao, O.; Nakai, H.; Vreven, T.; Throssell, K.; Montgomery, J. A., Jr.; Peralta, J. E.; Ogliaro, F.; Bearpark, M. J.; Heyd, J. J.; Brothers, E. N.; Kudin, K. N.; Staroverov, V. N.; Keith, T. A.; Kobayashi, R.; Normand, J.; Raghavachari, K.; Rendell, A. P.; Burant, J. C.; Iyengar, S. S.; Tomasi, J.; Cossi, M.; Millam, J. M.; Klene, M.; Adamo, C.; Cammi, R.; Ochterski, J. W.; Martin, R. L.; Morokuma, K.; Farkas, O.; Foresman, J. B.; Fox, D. J. Gaussian, Inc., Wallingford CT, 2016. .
- (4) Weigend, F.; Ahlrichs, R. Balanced Basis Sets of Split Valence, Triple Zeta Valence and Quadruple Zeta Valence Quality for H to Rn: Design and Assessment of Accuracy. *Phys. Chem. Chem. Phys.***2005**, 7 (18), 3297–3305. <https://doi.org/10.1039/B508541A>.
- (5) CYLview20; Legault, C. Y., Université de Sherbrooke, 2020 (<http://www.cylview.org>).
